# Supplementary material for: Three Novel Cheiroid Hyphomycetes in Dictyocheirospora and Dictyosporium (Dictyosporiaceae) from Freshwater Habitats in Guangdong and Guizhou Provinces, China
Source: MDPI journal article supplement (doi:10.3390/jof10040259), 2024-03-28
Supplement: s1 [file s1]

## Article

# Three novel cheiroid hyphomycetes in *Dictyocheiropsora* and *Dictyosporium* (Dictyosporiaceae) from freshwater habitats in Guangdong and Guizhou Provinces, China

Yongxin Shu <sup>1,2,3</sup>, Mingkwan Doilom <sup>1</sup>, Saranyaphat Boonmee <sup>2,3</sup>, Biao Xu <sup>1</sup>, and Wei Dong <sup>1,\*</sup>

<sup>1</sup> Innovative Institute for Plant Health / Key Laboratory of Green Prevention and Control on Fruits and Vegetables in South China, Ministry of Agriculture and Rural Affairs, Zhongkai University of Agriculture and Engineering, Guangzhou 510225, Guangdong, China

<sup>2</sup> Center of Excellence in Fungal Research, Mae Fah Luang University, Chiang Rai 57100, Thailand

<sup>3</sup> School of Science, Mae Fah Luang University, Chiang Rai 57100, Thailand

\* Correspondence: dongwei0312@hotmail.com

**Table S1.** Taxa used for phylogenetic analyses and their corresponding GenBank accession numbers. Newly generated sequences are indicated in red, ex-type strains are indicated in bold, and missing sequences are indicated with “–”.

| Species                                     | Source          | GenBank accession number |          |          |               |
|---------------------------------------------|-----------------|--------------------------|----------|----------|---------------|
|                                             |                 | LSU                      | SSU      | ITS      | <i>tefl-a</i> |
| <i>Aquadictyospora clematidis</i>           | MFLUCC 17-2080  | MT214545                 | MT226664 | MT310592 | MT394727      |
| <i>Aquadictyospora lignicola</i>            | MFLUCC 17-1318  | MF948629                 | –        | MF948621 | MF953164      |
| <i>Cheirosporium triseriale</i>             | HMAS 180703     | EU413954                 | –        | EU413953 | –             |
| <i>Dendryphiella phitsanuloken-sis</i>      | MFLUCC 17-2513  | MG754401                 | MG754402 | MG754400 | –             |
| <i>Dendryphiella variabilis</i>             | CBS 584.96      | LT963454                 | –        | LT963453 | –             |
| <i>Dictyocheiropsora acaciae</i>            | SDBR-CMU456     | OP965374                 | –        | OP965334 | OQ000840      |
| <i>Dictyocheiropsora acaciae</i>            | SDBR-CMU455     | OP965373                 | –        | OP965332 | OQ000839      |
| <i>Dictyocheiropsora aquadulcis</i>         | MFLUCC 17-2571  | MK634542                 | –        | MK634545 | –             |
| <i>Dictyocheiropsora aquatica</i>           | KUMCC 15-0305   | KY320513                 | –        | KY320508 | –             |
| <i>Dictyocheiropsora bannica</i>            | KH 332          | AB807513                 | AB797223 | LC014543 | AB808489      |
| <i>Dictyocheiropsora bannica</i>            | MFLUCC 16-0874  | MH381774                 | –        | MH381765 | –             |
| <i>Dictyocheiropsora cheiro-spora</i>       | KUMCC 17-0035   | MF177036                 | MF928073 | MF177035 | –             |
| <i>Dictyocheiropsora Chiangmaiensis</i>     | MFLUCC 22-0097  | OP526640                 | OP526621 | OP526630 | OP542232      |
| <i>Dictyocheiropsora clematidis</i>         | MFLUCC 17-2089  | MT214546                 | MT226665 | MT310593 | MT394728      |
| <i>Dictyocheiropsora gareth-jonesii</i>     | MFLUCC 16-0909  | KY320514                 | –        | KY320509 | –             |
| <i>Dictyocheiropsora gareth-jonesii</i>     | DLUCC 0848      | MF948631                 | –        | MF948623 | MF953166      |
| <i>Dictyocheiropsora gigantea</i>           | BCC 11346       | –                        | –        | DQ018095 | –             |
| <i>Dictyocheiropsora heptaspora</i>         | CBS 396.59      | –                        | DQ018082 | DQ018090 | –             |
| <i>Dictyocheiropsora indica</i>             | MFLUCC 15-0056  | MH381772                 | MH381757 | MH381763 | MH388817      |
| <i>Dictyocheiropsora lithocarpi</i>         | MFLUCC 17-2537  | MK347999                 | MK347888 | MK347781 | –             |
| <i>Dictyocheiropsora metroxylo-nis</i>      | MFLUCC 15-0028a | MH742313                 | MH742317 | MH742321 | –             |
| <i>Dictyocheiropsora metroxylo-nis</i>      | MFLUCC 15-0028b | MH742314                 | MH742318 | MH742322 | MH764301      |
| <i>Dictyocheiropsora multiappendiculata</i> | KUNCC 22-10736  | OP526643                 | OP526624 | OP526633 | OP542235      |
| <i>Dictyocheiropsora multiappendiculata</i> | KUNCC 22-10734  | OP526642                 | OP526623 | OP526632 | OP542234      |

| Species                                    | Source                         | GenBank accession number |          |           |               |
|--------------------------------------------|--------------------------------|--------------------------|----------|-----------|---------------|
|                                            |                                | LSU                      | SSU      | ITS       | <i>tef1-a</i> |
| <i>Dictyocheiropora nabanheensis</i>       | MFLUCC 17-0562                 | MH376712                 | –        | MH388340  | MH388375      |
| <i>Dictyocheiropora nabanheensis</i>       | MFLU 19-0538                   | MN511737                 | –        | MN513035  | –             |
| <i>Dictyocheiropora nabanheensis</i>       | C317                           | MK347973                 | MK347862 | MK347756  | –             |
| <i>Dictyocheiropora pandanicola</i>        | MFLUCC 16-0365                 | MH376713                 | MH388309 | MH388341  | MH388376      |
| <i>Dictyocheiropora pseudomusae</i>        | yone 234                       | AB807520                 | AB797230 | LC014550  | AB808496      |
| <i>Dictyocheiropora rotunda</i>            | MFLUCC 14-0293                 | KU179100                 | KU179101 | KU179099  | –             |
| <i>Dictyocheiropora rotunda</i>            | MFLUCC 17-0222                 | MH381773                 | –        | MH381764  | MH388818      |
| <i>Dictyocheiropora suae</i>               | KUNCC 22-12424                 | OP526641                 | OP526622 | OP526631  | OP542233      |
| <i>Dictyocheiropora submersa</i>           | MHZU 24-0282                   | PP326216                 | PP335106 | PP326193  | PP333133      |
| <i>Dictyocheiropora subramaniani</i>       | BCC 3503                       | –                        | –        | DQ018094  | –             |
| <i>Dictyocheiropora taiwanense</i>         | MFLUCC 17-2654                 | MK495820                 | –        | MK495821  | –             |
| <i>Dictyocheiropora thailandica</i>        | MFLUCC 18-0987                 | MN913743                 | –        | MT627734  | –             |
| <i>Dictyocheiropora vinaya</i>             | MFLUCC 14-0294                 | KU179103                 | KU179104 | KU179102  | –             |
| <i>Dictyocheiropora xishuangbannaensis</i> | <a href="#">KUMCC 17-0181</a>  | MH376714                 | MH388310 | MH388342  | MH388377      |
| <i>Dictyocheiropora xishuangbannaensis</i> | <a href="#">MFLUCC 17-2087</a> | MT214547                 | MT226666 | MT310594  | MT394729      |
| <i>Dictyosporium alatum</i>                | ATCC 34953                     | DQ018101                 | DQ018080 | DQ018088  | –             |
| <i>Dictyosporium appendiculatum</i>        | KUMCC 17-0311                  | MH376715                 | –        | MH388343  | –             |
| <i>Dictyosporium aquaticum</i>             | MF 1318                        | –                        | –        | KM610236  | –             |
| <i>Dictyosporium bulbosum</i>              | yone 221                       | AB807511                 | AB797221 | LC014544  | AB808487      |
| <i>Dictyosporium digitatum</i>             | SDBR-CMU459                    | OP965377                 | –        | OP965337  | OQ000841      |
| <i>Dictyosporium digitatum</i>             | KUMCC17-0269                   | MH376716                 | MH388311 | MH388344  | –             |
| <i>Dictyosporium digitatum</i>             | KH401                          | AB807515                 | AB797225 | LC014545  | AB808491      |
| <i>Dictyosporium digitatum</i>             | KT2660                         | AB807518                 | AB797228 | LC014546  | AB808494      |
| <i>Dictyosporium digitatum</i>             | yone 208                       | AB807512                 | AB797222 | LC014547  | AB808488      |
| <i>Dictyosporium digitatum</i>             | MHZU 24-0285                   | PP326214                 | PP335104 | PP326191  | PP333111      |
| <i>Dictyosporium duliuijiangense</i>       | GZCC 19-0426                   | MW133815                 | –        | OQ842725  | OQ850746      |
| <i>Dictyosporium elegans</i>               | NBRC 32502                     | DQ018100                 | DQ018079 | DQ018087  | –             |
| <i>Dictyosporium guangdongense</i>         | MHZU 24-0283                   | PP326213                 | PP335103 | PP326190  | –             |
| <i>Dictyosporium guttulatatum</i>          | MFLUCC 16-0258                 | MH376717                 | MH388312 | MH388345  | MH388379      |
| <i>Dictyosporium hongkongensis</i>         | KMUCC 17-0268                  | MH376718                 | MH388313 | MH388346  | MH388380      |
| <i>Dictyosporium hughesii</i>              | KT 1847                        | AB807517                 | AB797227 | LC014548  | AB808493      |
| <i>Dictyosporium karsti</i>                | MFLU 18-2282                   | –                        | OR134404 | OR225025  | OR140390      |
| <i>Dictyosporium krabiense</i>             | MFLU 16-1890                   | MH376719                 | MH388314 | –         | MH388381      |
| <i>Dictyosporium marinum</i>               | GJ357                          | MN017841                 | –        | –         | –             |
| <i>Dictyosporium meiosporum</i>            | MFLUCC 10-0131                 | KP710945                 | KP710946 | KP710944  | –             |
| <i>Dictyosporium muriformis</i>            | GZCC 20-0006                   | MN897834                 | MN901117 | MT002304  | MT023011      |
| <i>Dictyosporium nigroapice</i>            | MFLUCC 17-2053                 | MH381777                 | MH381762 | MH381768  | MH388821      |
| <i>Dictyosporium nigroapice</i>            | BCC 3555                       | –                        | –        | DQ018085  | –             |
| <i>Dictyosporium olivaceosporum</i>        | KH 375                         | AB807514                 | AB797224 | LC014542  | AB808490      |
| <i>Dictyosporium palmae</i>                | CBS-H 22129                    | KX555648                 | –        | –         | –             |
| <i>Dictyosporium pandanicola</i>           | MFLU 16-1886                   | MH376720                 | –        | MH388347  | MH388382      |
| <i>Dictyosporium sexualis</i>              | MFLUCC 10-0127                 | KU179106                 | KU179107 | KU179105  | –             |
| <i>Dictyosporium sp.</i>                   | MFLUCC 15-0629                 | MH381775                 | –        | MH381766  | MH388819      |
| <i>Dictyosporium stellatum</i>             | CCFC 241241                    | JF951177                 | –        | NR_154608 | –             |
| <i>Dictyosporium streitzi</i>              | CBS 123359                     | FJ839653                 | –        | NR_156216 | –             |
| <i>Dictyosporium tetrasporum</i>           | KT 2865                        | AB807519                 | AB797229 | LC014551  | AB808495      |

| Species                                     | Source              | GenBank accession number |                 |                 |                 |
|---------------------------------------------|---------------------|--------------------------|-----------------|-----------------|-----------------|
|                                             |                     | LSU                      | SSU             | ITS             | <i>tef1-a</i>   |
| <i>Dictyosporium thailandicum</i>           | MFLUCC 13-0773      | KP716707                 | –               | KP716706        | –               |
| <i>Dictyosporium tratense</i>               | MFLUCC 17-2052      | MH381776                 | MH381761        | MH381767        | MH388820        |
| <i>Dictyosporium tubulatum</i>              | MFLUCC 15-0631      | MH381778                 | –               | MH381769        | MH388822        |
| <i>Dictyosporium tubulatum</i>              | MFLUCC 17-2056      | MH381779                 | –               | MH381770        | –               |
| <b><i>Dictyosporium variabilisporum</i></b> | <b>MHZU 24-0284</b> | <b>PP326215</b>          | <b>PP335105</b> | <b>PP326192</b> | <b>PP333112</b> |
| <i>Dictyosporium wuyiense</i>               | CGMCC 3.18703       | –                        | –               | KY072977        | –               |
| <i>Dictyosporium zhejiangense</i>           | MW-2009a            | –                        | –               | FJ456893        | –               |
| <i>Digitodesmium Chiangmaiense</i>          | KUN-HKAS 102163     | MK571766                 | MK571775        | –               | –               |
| <i>Digitodesmium polybrachiatum</i>         | COAD 3174           | MW879316                 | MW879325        | MW879318        | –               |
| <i>Digitodesmium polybrachiatum</i>         | COAD 3175           | MW879317                 | MW879326        | MW879319        | –               |
| <i>Gregarithecium curvisporum</i>           | KT 922              | AB807547                 | AB797257        | AB809644        | –               |
| <i>Gregarithecium curvisporum</i>           | MFLUCC 13-0853      | KX364282                 | KX364283        | KX364281        | –               |
| <i>Immotthia atrograna</i>                  | ZT-Myc-64283        | –                        | –               | MW489540        | –               |
| <i>Immotthia bambusae</i>                   | KUN-HKAS 112012A1   | MW489450                 | MW489461        | MW489455        | MW504646        |
| <i>Jalapriya inflata</i>                    | NOU 3855            | JQ267363                 | JQ267361        | JQ267362        | –               |
| <i>Jalapriya pulchra</i>                    | MFLUCC 15-0348      | KU179109                 | KU179110        | KU179108        | –               |
| <i>Neodendryphiella mali</i>                | FMR 16561           | LT906657                 | –               | LT906655        | –               |
| <i>Neodendryphiella tarraconensis</i>       | GZCC 20-0002        | MN999927                 | –               | MN999922        | –               |
| <i>Periconia igniaria</i>                   | CBS 379.86          | AB807566                 | –               | LC014585        | AB808542        |
| <i>Periconia igniaria</i>                   | CBS 845.96          | AB807567                 | –               | LC014586        | AB808543        |
| <i>Pseudocoleophoma bauhiniae</i>           | MFLUCC 17-2586      | MK347953                 | MK347844        | MK347736        | MK360076        |
| <i>Pseudocoleophoma calamagrostidis</i>     | KT 3284             | LC014609                 | LC014604        | LC014592        | LC014614        |
| <i>Pseudocoleophoma flavescens</i>          | CBS 178.93          | GU238075                 | GU238216        | –               | –               |
| <i>Pseudocoleophoma zingiberacearum</i>     | NCYUCC 19-0052      | MN616753                 | –               | MN615939        | MN629281        |
| <i>Pseudocyclothyriella clematidis</i>      | MFLUCC 17-2177      | MT214549                 | –               | MT310596        | MT394730        |
| <i>Pseudocyclothyriella clematidis</i>      | MFLUCC 17-2177A     | MT214548                 | MT226667        | MT310595        | –               |
| <i>Pseudodictyosporium elegans</i>          | CBS 688.93          | DQ018106                 | DQ018084        | DQ018099        | –               |
| <i>Pseudodictyosporium wauense</i>          | NBRC 30078          | DQ018105                 | DQ018083        | DQ018098        | –               |
| <i>Pseudodictyosporium wauense</i>          | DLUCC 0801          | MF948630                 | –               | MF948622        | MF953165        |
| <i>Verrucocum coppinsii</i>                 | E00396112           | MT918766                 | MT918774        | MT918782        | –               |
| <i>Verrucocum spribillei</i>                | SPO1154             | MT918764                 | MT918772        | MT918781        | –               |
| <i>Vikalpa australiensis</i>                | HKUCC 8797          | –                        | –               | DQ018092        | –               |
| <i>Vikalpa grandispora</i>                  | KUNCC 22-12425      | OP526648                 | OP526628        | OP526638        | OP542240        |
| <i>Vikalpa sphaerica</i>                    | CGMCC 3.20682       | OP526649                 | OP526629        | OP526639        | OP542A85        |
